# Supplementary material
Source: PubMed Central journal article supplement (PMC2688451)
Supplement: NIHMS98050-supplement-supplement_1.pdf [file NIHMS98050-supplement-supplement_1.pdf]

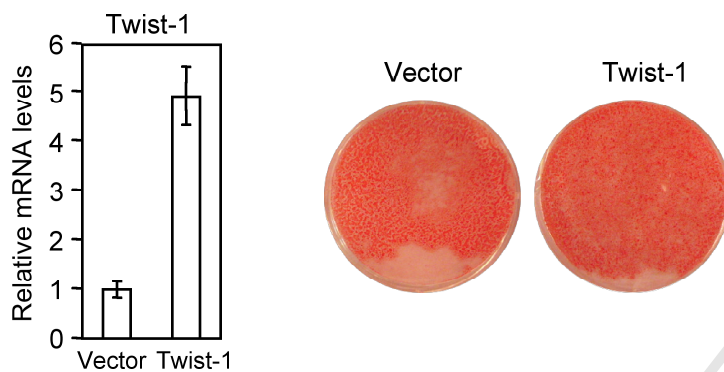

**Supplemental Figure 1 Adipogenic differentiation is not affected in 3T3-L1 cells expressing twist-1.** Twist-1 was stably overexpressed in 3T3-L1 preadipocytes (left panel). Differentiated adipocytes were stained with oil red O (right panel).

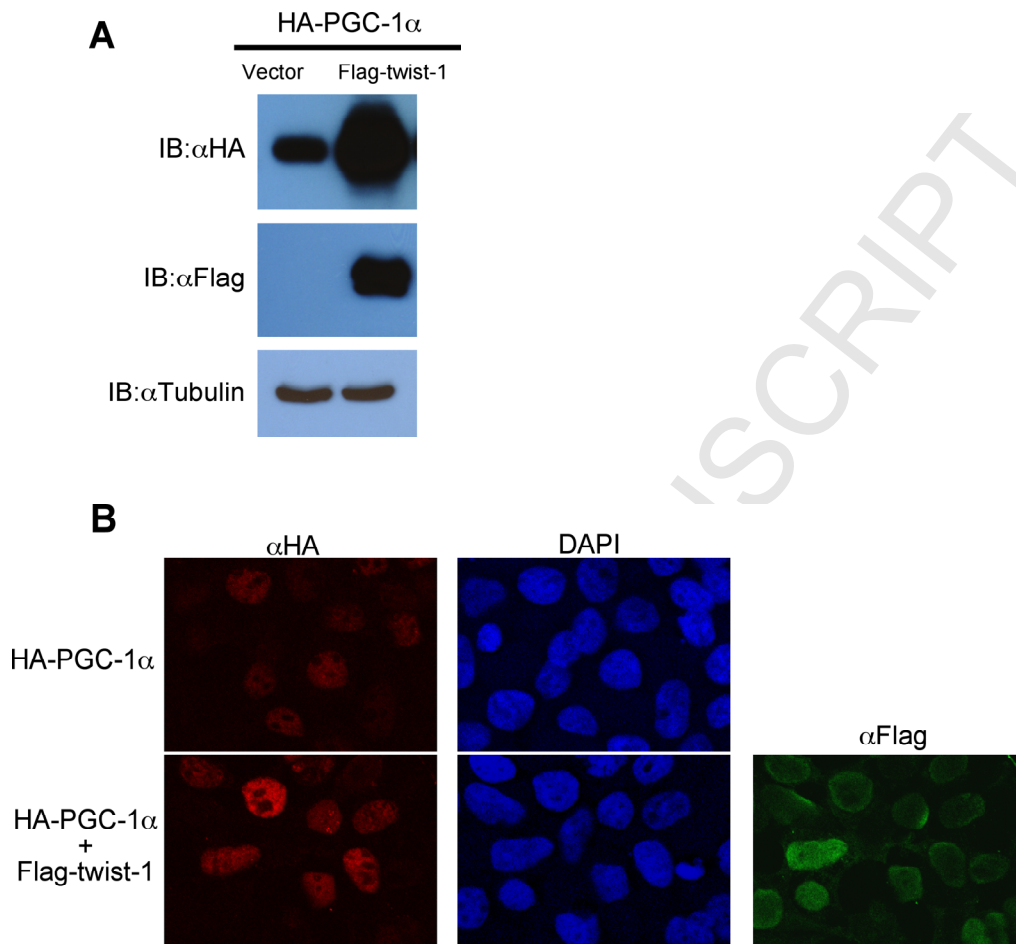

**Supplemental Figure 2 Overexpression of twist-1 increases PGC-1 $\alpha$  protein level and has no effect on its nuclear localization.** HEK293 cells were transfected with HA-PGC-1 $\alpha$  along with vector or Flag-twist-1 constructs. Western blot analysis (A) and immunofluorescence staining (B) were performed. DAPI staining showed the nuclei of the cells.

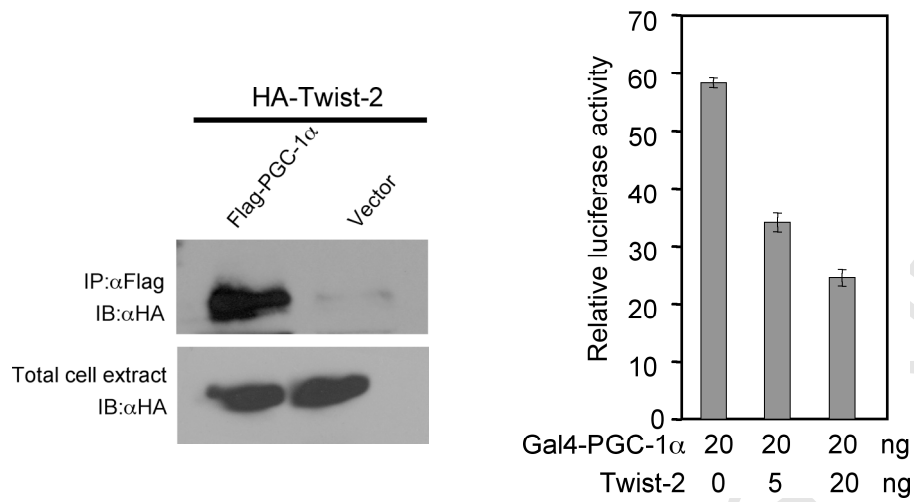

**Supplemental Figure 3 Twist-2 interacts with PGC-1 $\alpha$  and inhibits PGC-1 $\alpha$  transcriptional activity with reporter assay .**

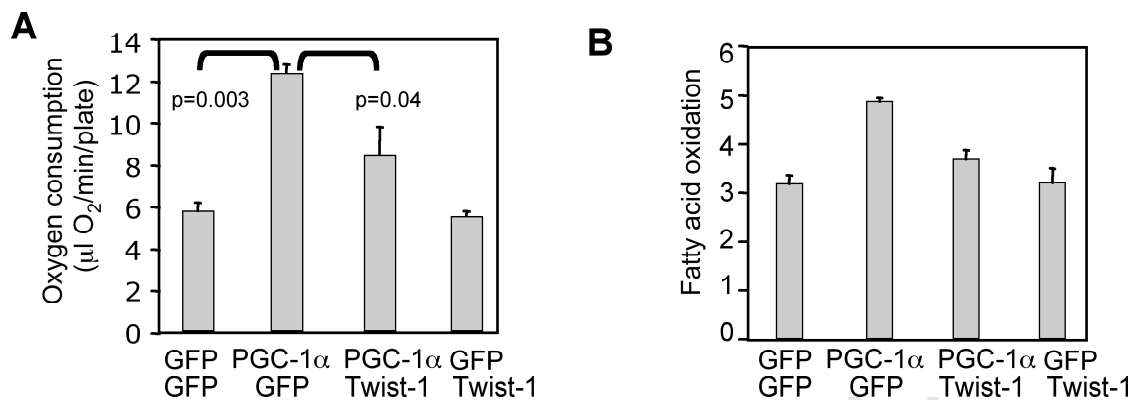

**Supplemental Figure 4 Twist-1 suppresses PGC-1 $\alpha$ -stimulated oxygen consumption and fatty acid oxidation.** C2C12 myotubes were infected with adenovirus expressing indicated constructs. **(A)** Forty-eight hours after infection, cells were assayed for oxygen consumption with a Clark-type electrode. Data are average of three independent experiments. **(B)** Cells were treated with <sup>3</sup>H-oleic acid and then assayed for fatty acid oxidation.

ACCEPTED MANUSCRIPT

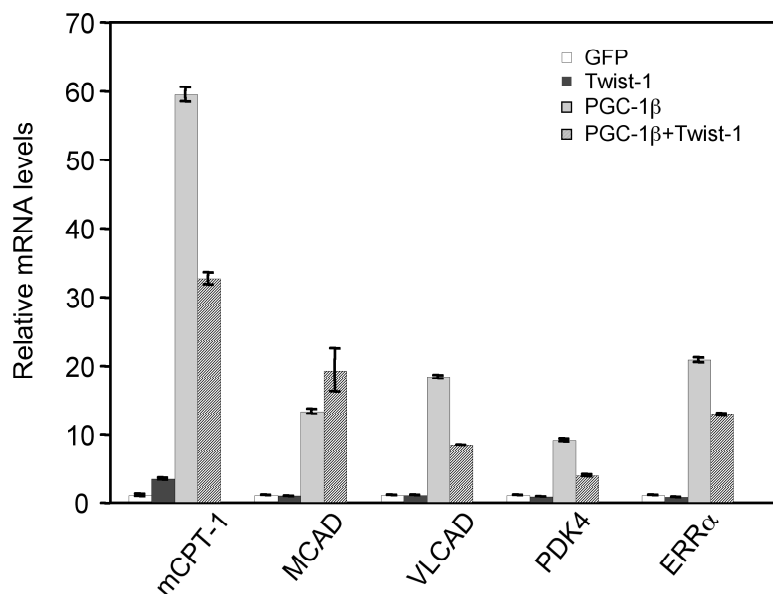

**Supplemental Figure 5 Effects of twist-1 on PGC-1 $\beta$ -induced gene expression.**

C2C12 myotubes were infected with adenovirus expressing indicated constructs. Expression of PGC-1 target genes was analyzed by real-time QPCR. Compared to Figure 3A, the inhibitory effects of twist-1 on PGC-1 $\beta$  is much less than on PGC-1 $\alpha$ .

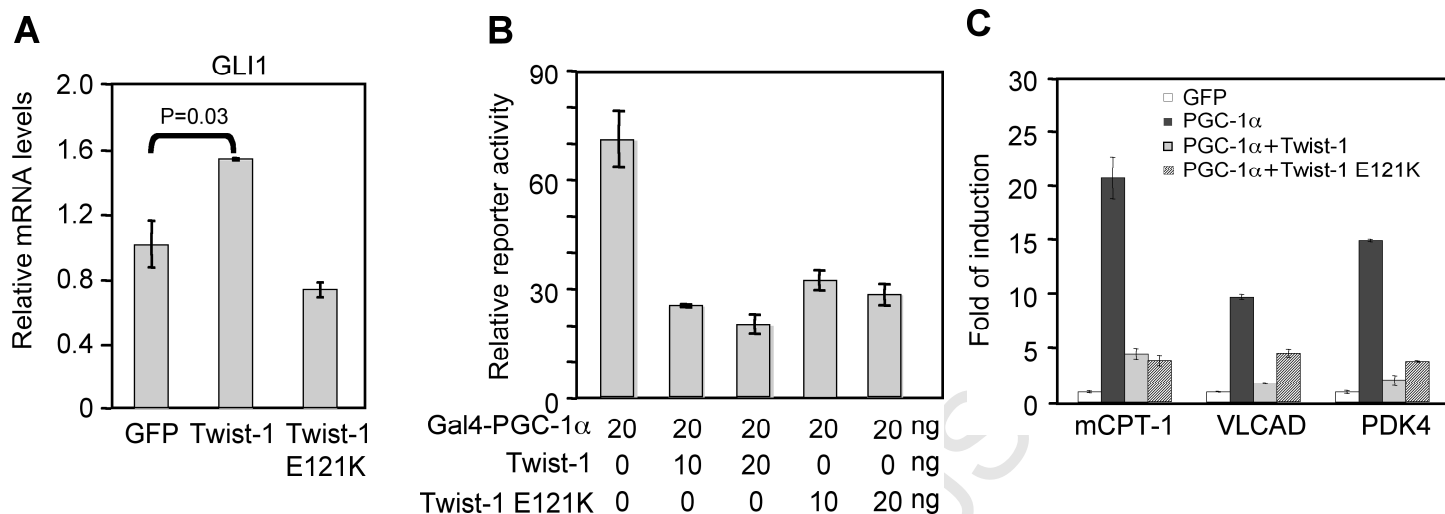

**Supplemental Figure 6 The E121K twist-1 point mutation loses its ability to induce GLI1 expression yet is still capable of suppressing PGC-1 $\alpha$  function.** (A) Mouse embryonic fibroblast cells were infected with indicated adenovirus and GLI1 expression was analyzed by real-time QPCR. (B) Reporter assays were performed in cos-7 cells. (C) C2C12 myotubes were infected with adenovirus expressing PGC-1 $\alpha$  and twist-1 constructs. Expression of PGC-1 $\alpha$  target genes was analyzed by real-time QPCR.

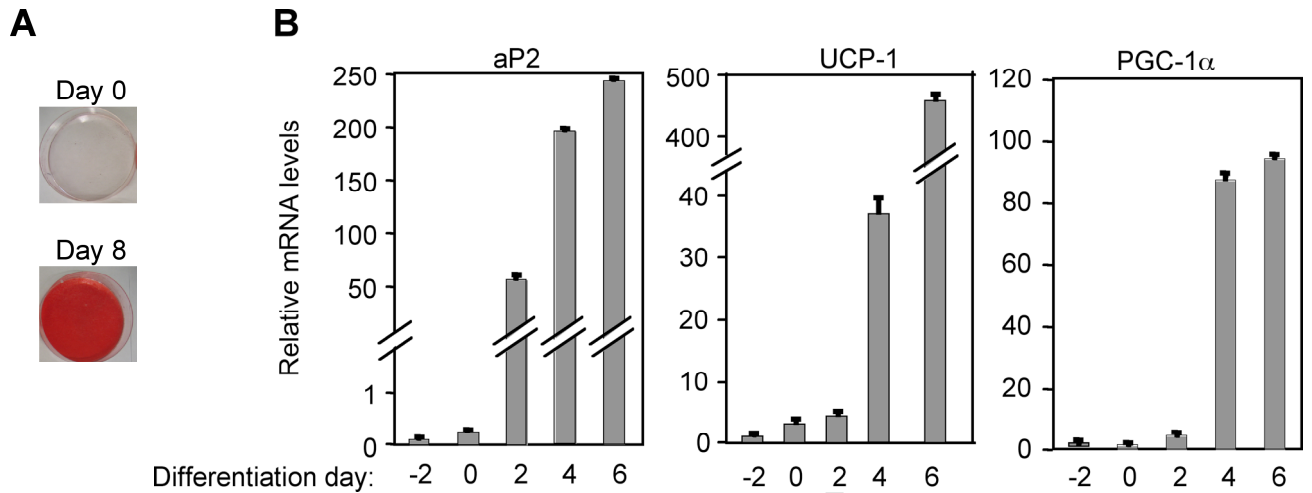

**Supplemental Figure 7 Generation of immortalized preadipocyte brown fat cells (8f/f).** (A) shown was oil-red O staining for lipids before and after differentiation. (B) Expression of general adipocyte marker (aP2) and brown fat specific markers (UCP-1 and PGC-1 $\alpha$ ) during adipogenic differentiation.

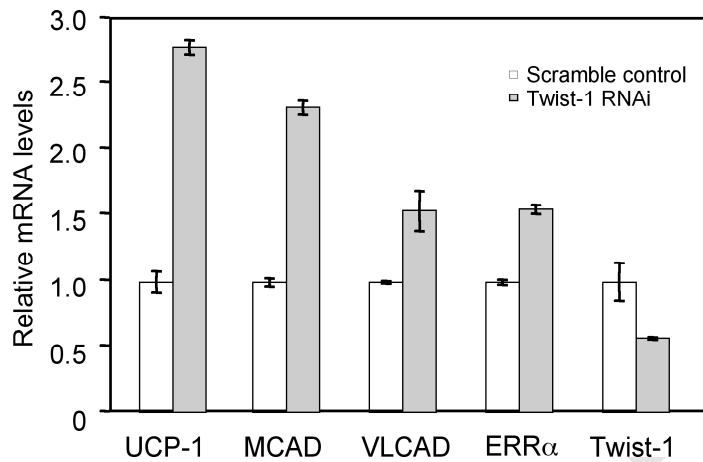

**Supplemental Figure 8 Knockdown of twist-1 with a second targeting construct similarly induces expression of PGC-1 $\alpha$  target genes.** Brown fat preadipocytes were infected with twist-1 RNAi lentivirus. Cells were then differentiated and gene expression was analyzed. Targeting sequence of twist-1 RNAi is available on Supplemental Table 1.



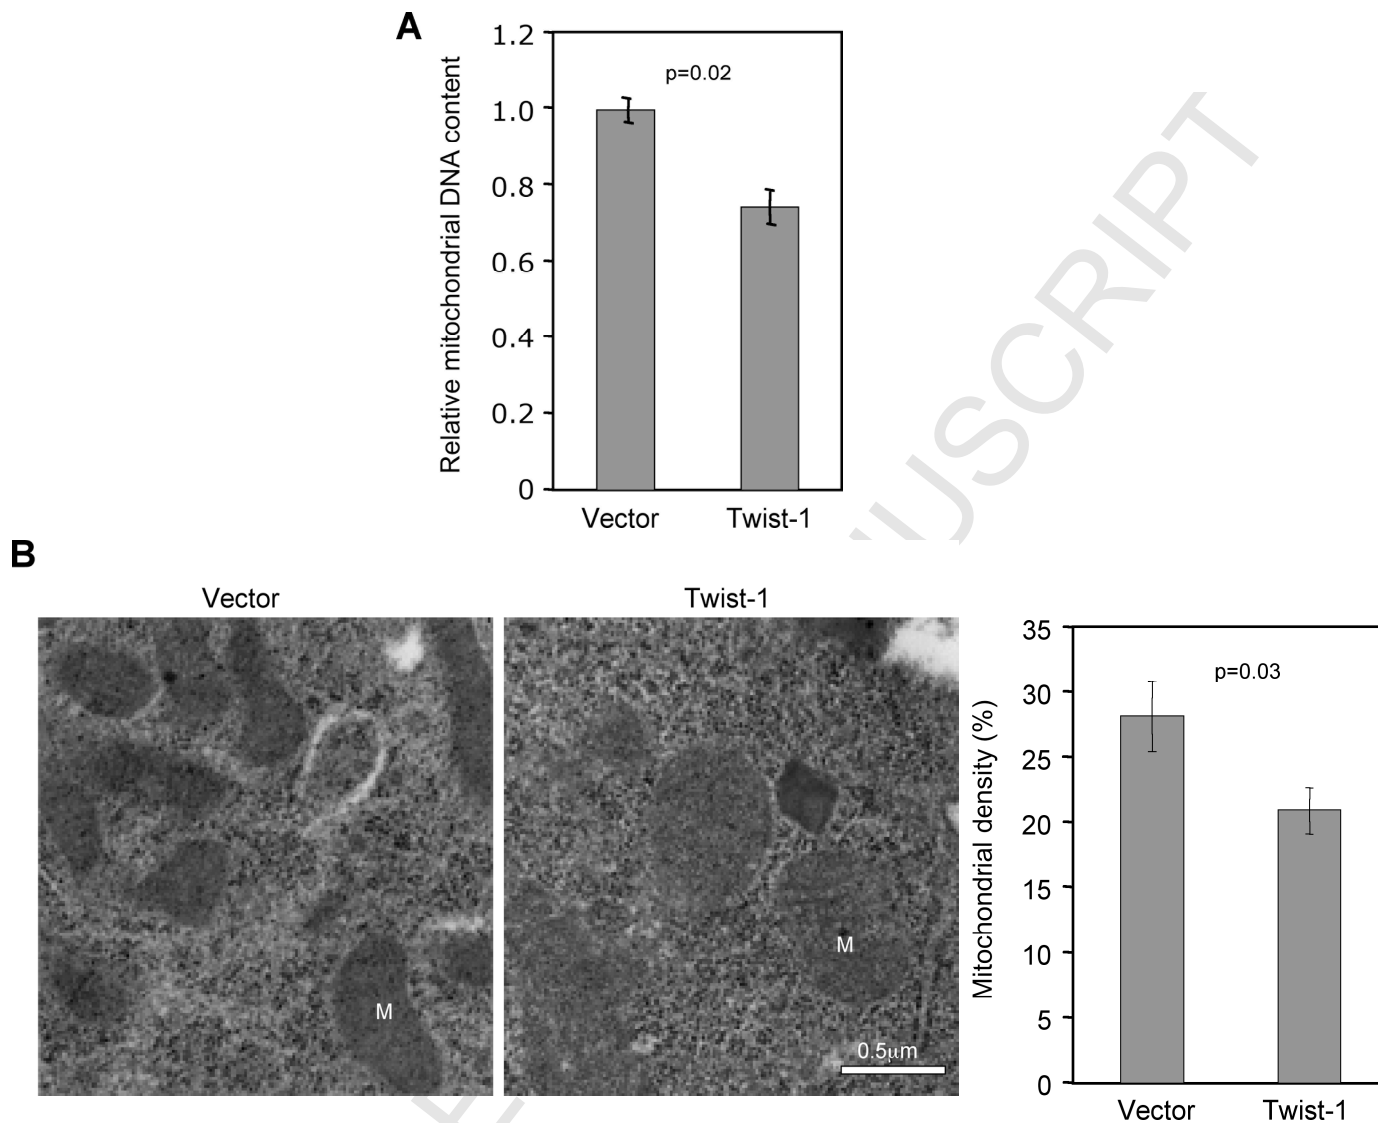

**Supplemental Figure 9 Overexpression of twist-1 in brown fat cells suppresses mitochondrial biogenesis.** Twist-1 was stably expressed in brown fat preadipocytes and differentiated. **(A)** Mitochondrial DNA content. The level of mitochondrial genome-encoded CoxII gene was measured by QPCR and normalized by the level of  $\beta$ -globin. **(B)** Left, representative electron microscopy micrographs. Right, Quantification of mitochondrial density from eleven micrographs.

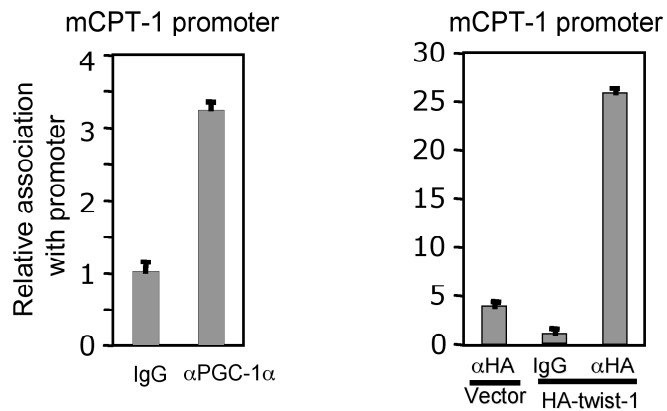

**Supplemental Figure 10 Chromatin immunoprecipitation assay on mCPT-1 promoter.** Both PGC-1 $\alpha$  and twist-1 associate with the PPAR-binding element in the mCPT-1 promoter.

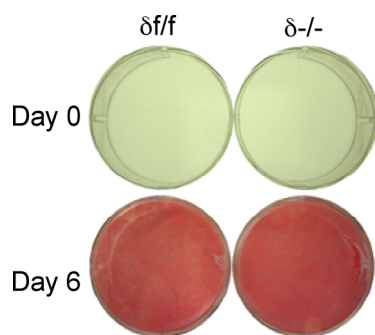

**Supplemental Figure 11 PPAR $\delta$ -deficient cells have normal adipogenesis.** PPAR $\delta$  was deleted in brown fat preadipocytes by cre adenovirus and cells were then differentiated and stained with oil red O.

ACCEPTED MANUSCRIPT

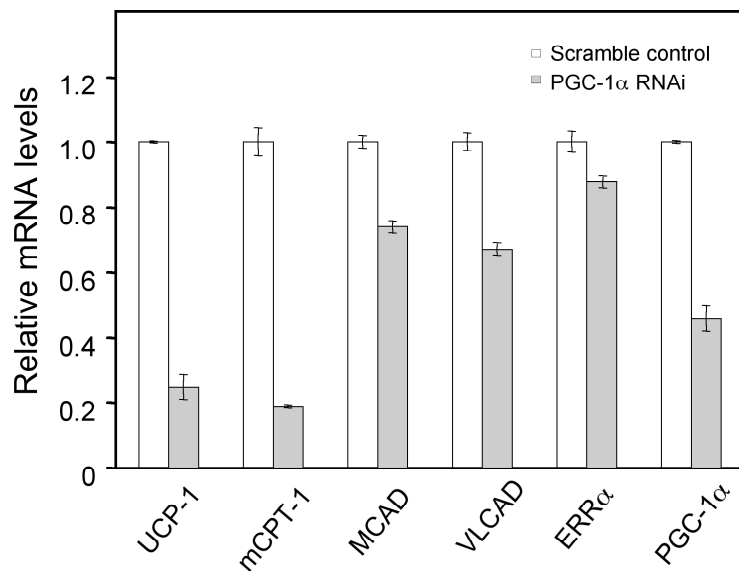

**Supplemental Figure 12 Decreased expression of UCP1 and fatty acid oxidation genes with a second PGC-1 $\alpha$  knockdown construct.** Brown fat preadipocytes were infected with PGC-1 $\alpha$  RNAi lentivirus. Cells were then differentiated and gene expression was analyzed. Targeting sequence of PGC-1 $\alpha$  RNAi is available on Supplemental Table 1.

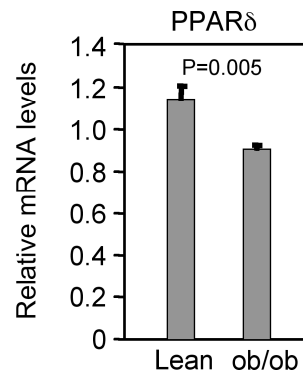

**Supplemental Figure 13 PPAR $\delta$  level was decreased in the brown fat of obese mice (n=3 mice per group).**

ACCEPTED MANUSCRIPT

**Supplementary Table 1 Gene full names and sequences of primers used in this study.**

| Gene symbol     | Gene full name                                                          | Primers used for real-time QPCR                                                            |
|-----------------|-------------------------------------------------------------------------|--------------------------------------------------------------------------------------------|
| mCPT-1          | Carnitine palmitoyltransferase 1b, muscle                               | F: 5'GGGCACCTCTGGGAGTTTGT3'<br>R: 5'TTGGCTCACCCACACAGTGT3'                                 |
| MCAD            | Acyl-coenzyme A dehydrogenase, medium chain                             | F: 5'GCCAAGATCTATCAGATTTATGAAGGT3'<br>R: 5'AGCTATGATCAGCCTCTGAATTTGT3'                     |
| VLCAD           | Acyl-coenzyme A dehydrogenase, very long chain                          | F: 5'GCCAGGGCAGAATCGAAGT3'<br>R: 5'TGGTAAGCTGGCCTTTGAACAT3'                                |
| PDK4            | Pyruvate dehydrogenase kinase, isoenzyme 4                              | F: 5'GCAGTAGTCCAAGATGCCTTTGA3'<br>R: 5'AATACTGGTCGCAGAGCATCTTT3'                           |
| LCAD            | Acetyl-coenzyme A dehydrogenase, long chain                             | F: 5'CCCTCCGCCCGATGTT3'<br>R: 5'AAGGAGTTTCTAGACGCGCTTCT3'                                  |
| ERR $\alpha$    | Estrogen-related receptor alpha                                         | F: 5'AGCAAGCCCCGATGGA3'<br>R: 5'GAGAGGCCTGGGATGCTCTT3'                                     |
| FAS             | Fatty acid synthase                                                     | F: 5'TGATGATTCAGGGAGTGGATATTG3'<br>R: 5'CCGAGCCAGGGACTTCTTAGT3'                            |
| ACC2            | Acetyl-coenzyme A carboxylase beta                                      | F: 5'CCTACTATGAGGCCCAGCATGT3'<br>R: 5'TCGGCCTCTCTTACCAGAT3'                                |
| UCP-1           | Uncoupling protein 1 (mitochondrial, proton carrier)                    | F: 5'GAGGTGTGGCAGTGTTCATTG3'<br>R: 5'GGCTTGCATTCTGACCTTCA3'                                |
| aP2             | Fatty acid binding protein 4, adipocyte                                 | F: 5'GGCGTGACTTCCACAAGAGTTTA3'<br>R: 5'GCCTCTTCCTTTGGCTCATG3'                              |
| U36b4           | Ribosomal protein, large, P0                                            | F: 5'AGATGCAGCAGATCCGCA3'<br>R: 5'GTTCTTGCCCATCAGCACC3'                                    |
| Twist-1         | Twist gene homolog 1(Drosophila)                                        | F: 5'AGATGTCATTGTTTCCAGAGAAGGA3'<br>R: 5'TTAGTTATCCAGCTCCAGAGTCTCTAGA3'                    |
| PGC-1 $\alpha$  | Peroxisome proliferative activated receptor, gamma, coactivator 1 alpha | F: 5'AACCACACCCACAGGATCAGA3'<br>R: 5'TCTTCGCTTTATTGCTCCATGA3'                              |
| PPAR $\alpha$   | Peroxisome proliferative activated receptor alpha                       | F: 5'ACAAGGCCTCAGGGTACCA3'<br>R: 5'GCCGAAAGAAGCCCTTACAG3'                                  |
| PPAR $\delta$   | Peroxisome proliferative activated receptor delta                       | F: 5'GCCTCGGGCTTCCACTAC3'<br>R: 5'AGATCCGATCGCACTTCTCA3'                                   |
| PPAR $\gamma$   | Peroxisome proliferative activated receptor gamma                       | F: 5'CAAGAATACCAAAGTGCGATCAA3'<br>R: 5'GAGCTGGGTCTTTTCAGAATAATAAG3'                        |
| GLI1            | GLI-Krupped family member GLI1                                          | F: 5'TGGTAGAGGGAAGTCCAGGT3'<br>R: 5'ACCCTGGGACCCTGACATA3'                                  |
| CoxII           | Cytochrome c oxidase subunit II                                         | F: 5'GCCGACTAAATCAAGCAACA3'<br>R: 5'CAATGGGCATAAAGCTATGG3'                                 |
| $\beta$ -globin | Hemoglobin, beta adult major chain                                      | F: 5'GAAGCGATTCTAGGGAGCAG3'<br>R: 5'GGAGCAGCGATTCTGAGTAGA3'                                |
| CPT1A           | Carnitine palmitoyltransferase 1a, liver                                | F: 5'TCATCCATGCATACCAAAGTG3'<br>R: 5'ACGCCACTCACGATGTTCTT3'                                |
| ACC1            | Acetyl-Coenzyme A carboxylase alpha                                     | F: 5'CATGTTGAGACGCTGGTTTG3'<br>R: 5'GGACGCCATCTTCTCTGT3'                                   |
| Dgat1           | Diacylglycerol O-acyltransferase 1                                      | F: 5'ACGGCTACTGGGATCTGAGG3'<br>R: 5'TCACCACACACCAATTCAGG3'                                 |
| Gpam            | Glycerol-3-phosphate acyltransferase, mitochondrial                     | F: 5'CCTCTTTTGCCACAACATCA3'<br>R: 5'CGAGCCTCCGTCTTATGAAA3'                                 |
| Mttp            | Microsomal triglyceride transfer protein                                | F: 5'TAGGGAAGGACAACCTGGAG3'<br>R: 5'CTATGCCCACTGGCTCGTTT3'                                 |
| UCP-1           | Uncoupling protein 1                                                    | Primers used for CHIP assays<br>F: 5'AGTGAAGCTTGCTGTCACTC3'<br>R: 5'GTCTGAGGAAAGGGTTGACC3' |

|                |                                           |                                                                                                                                                                                                      |
|----------------|-------------------------------------------|------------------------------------------------------------------------------------------------------------------------------------------------------------------------------------------------------|
| Twist-1        |                                           | F: 5'AACTGGGAAGTTCCTGTGGA3' (for distal site)<br>R: 5'CAGCAAGCTGGTAGGTTCA3' (for distal site)<br>F: 5'GGTGCAGGAGTGGCTTTATT3' (for proximal site)<br>R: 5'AAGCTCTCTTCTGAGGCCAGT3' (for proximal site) |
| mCPT-1         | Carnitine palmitoyltransferase 1b, muscle | F: 5'ACTGTCAACCTTGAGCCCTGGAATTAG3'<br>R: 5'TTGCATCAGTCCTAAAAATAGCTGAATGTA3'                                                                                                                          |
| aP2            | Fatty acid binding protein 4, adipocyte   | F: 5'ACATTTACCCAGAGAGAAGGGATTGTAGT3'<br>R: 5'AACTCTGATCCAGTAAGAAGGCAAATGTC3'                                                                                                                         |
| Twist-1        |                                           | RNAi target sequence<br>Sequence1: AAGCTGAGCAAGATTCAGACC (Yang et al., 2004)<br>Sequence2: AGCGGGTCATGGCTAACGTGC (Yang et al., 2004)                                                                 |
| PGC-1 $\alpha$ |                                           | Sequence1: GGTGGATTGAAGTGGTGTAGA (Koo et al., 2004)<br>Sequence2: CCCATTTGAGAACAAGACTAT                                                                                                              |

ACCEPTED MANUSCRIPT

### Supplemental Experimental Procedures

**Generation and differentiation of brown fat cells.** Brown fat was isolated from the newborn mice and digested by collagenase. Preadipocytes were immortalized by infection with the retroviral virus expressing SV40 T antigen and selected with G418.

To generate PPAR $\delta$  knockout brown fat preadipocytes,  $\delta f/f$  preadipocytes were infected with adenovirus expressing cre recombinase. Cells infected with GFP adenovirus were used as controls. Deletion of the PPAR $\delta$  alleles was verified by PCR genotyping.

Differentiation was performed according to a standard protocol (Tseng et al., 2004). Briefly, cells were grown to confluence in culture medium containing 20 nM insulin and 1 nM 3,3',5-triiodo-L-thyronine (differentiation medium) (Day 0).

Differentiation was induced by treating confluent cells for 48 h in differentiation medium supplemented with 0.5 mM isobutylmethylxanthine, 0.5  $\mu$ M dexamethasone, and 0.125 mM indomethacin. After this induction period, cells were changed back to differentiation medium. The cells start to accumulate lipid droplet at Day 1 and a fully differentiated phenotype of nearly 100% of cells could be observed at Day 5. All experiments with the brown fat cells were performed after differentiation, unless otherwise indicated.

**Oil red O staining.** Cells were fixed with 3.7% formaldehyde for 15 min at room temperature and then stained with 0.3% (W/V) oil red O solution in 60% isopropyl alcohol for 1 h. The excess staining was removed by washing with water.



**Luciferase reporter assays.** Cos-7 cells in 48-well plates were transfected with luciferase reporters, CMV- $\beta$ -galactosidase plasmids and indicated expression constructs, using lipofectamine 2000 (Invitrogen). Vector plasmids were used to adjust the total amount of plasmids per well. Luciferase activity was measured 48 h after transfection and normalized with  $\beta$ -galactosidase activity.

**Co-immunoprecipitation.** To determine the interaction between twist-1 and co-activators in HEK293 cells, cells were co-transfected with indicated plasmids. Forty-eight hours after transfection, cells were lysed in buffer [250 mM NaCl, 50 mM Tris (pH 7.5), 0.5% TritonX-100, 5% glycerol]. Cell extracts were incubated with antibody beads and the beads were washed with buffer [250 mM NaCl, 50 mM Tris (pH 7.5), 0.1% TritonX-100, 5% glycerol] for four times. Immunoprecipitates were probed with indicated antibodies.

To examine the association between twist-1 and PGC-1 $\alpha$  at physiological levels in brown fat cells, we generated a stable brown fat cell line that expresses HA-tagged twist-1 at a level close to its endogenous level. Briefly,  $\delta f/f$  brown fat preadipocytes were infected with HA-tagged twist-1 retrovirus for a 10% infection efficiency to ensure a single copy integration. The preadipocytes were differentiated. At day 7, nuclear extracts were isolated as described (Schreiber et al., 1989) and incubated for 2 h with agarose beads conjugated with PGC-1 $\alpha$  antibody or IgG. The beads were washed 4 times with washing buffer [100 mM NaCl, 50mM Tris (pH 7.5), 0.1% NP-40, 3% glycerol]. Immunoprecipitates were analyzed by Western blotting.

**Chromatin immunoprecipitation (CHIP) assays.** Brown fat preadipocytes were differentiated for 6 days. CHIP assays were performed using the Upstate protocol with antibodies against HA (H6908, Sigma), PGC-1 $\alpha$  (sc-13067, Santa Cruz), PPAR $\delta$  (sc-7197, Santa Cruz), PPAR $\gamma$  (sc-7196, Santa Cruz), acetyl-Histone H3 (06-599, Upstate), or HDAC5 (H9663, Sigma). Precipitated DNA fragments were purified with QIAquick PCR Purification Kit (Qiagen). Immunoprecipitate signal was normalized with input signal; both were measured by real-time QPCR. Primer sequences were available in Supplementary Table 1.

**Electron microscopy.** Samples were fixed in 2.5% glutaraldehyde in PBS (pH 7.2), washed, and then post-fixed in 1% osmium tetroxide. The fixed samples were dehydrated through a graded series of ethanol to 100%, followed by two changes of propylene oxide and finally into a 50:50 (v/v) mixture of propylene oxide: epoxy resin (SPON 812/Araldite 502), and left overnight to infiltrate. Samples were processed through two changes of fresh epoxy resin and embedded, allowing the blocks to polymerize 48 hrs at 70°C. Ultrathin sections were cut on a Reichart-Jung ultramicrotome using a diamond knife. The sections (64 nm thick) were collected and mounted on copper support grids and contrasted with lead citrate and uranyl acetate, and examined on a Philips CM 10 transmission electron microscope at 80 Kv accelerating voltage.
